# Supplementary material for: Theranostic probe for simultaneous in vivo photoacoustic imaging and confined photothermolysis by pulsed laser at 1064 nm in 4T1 breast cancer model
Source: Royal Society of Chemistry journal article supplement (doi:10.1039/c4nr05386a), 2014-01-01
Supplement: c4nr05386a1.pdf [file c4nr05386a1.pdf]

## Supporting Information

### **Theranostic Probe for Simultaneous *in vivo* Photoacoustic Imaging and Confined Photothermolysis by Pulsed Laser at 1064 nm in 4T1 Breast Cancer Model**

Min Zhou <sup>a</sup>, Geng Ku <sup>a</sup>, Qian Huang <sup>a</sup>, Laura Pagon <sup>b</sup>, and Chun Li <sup>a,\*</sup>

<sup>a</sup> Department of Cancer Systems Imaging and <sup>b</sup> Department of Veterinary Medicine & Surgery,

The University of Texas MD Anderson Cancer Center, Houston, Texas 77030

**\*Corresponding Author:** Chun Li, Department of Cancer Systems Imaging, Unit 1907, The University of Texas MD Anderson Cancer Center, Houston, Texas 77030; Tel: 713-792-5182; Fax: 713-794-5456; E-mail: cli@mdanderson.org.

## Table of Contents

### 1. Methods

- a. Stability of PEG-CuS NPs in physiological media.
- b. Preparation of PEG-[<sup>64</sup>Cu]CuS NPs.
- c. Photoacoustic (PA) imaging equipment.
- d. Copper staining in 4T1 tumors.
- e. Study of temperature changes in aqueous solution of CuS NPs under 1064-nm and 808-nm NIR laser light.
- f. Statistical analysis.

2. Figure S1. Dynamic light scattering measurement of the size of PEG-CuS NPs in water after 6 months storage at 4°C in the presence of argon.

3. Figure S2. UV-Vis spectra of PEG-CuS NPs 7 days after incubation in physiological media.

4. Figure S3. Copper staining of excised 4T1 tumors from mice injected with PEG-CuS NPs.

5. Figure S4. Temperature change after exposure of aqueous solution of PEG-CuS NPs to a continuous wave laser light at 808 nm and a pulsed laser I at 1064 nm.

Figure S5. Quantitative analysis of the percentage of necrosis induced by various treatments.

## Methods

### a. Stability of CuS NPs in different media.

The stability of PEG-CuS NPs in different media were investigated by incubating PEG-CuS NPs in phosphate-buffered saline (PBS) and PBS containing 10% fetal bovine serum (FBS) at 37 °C for 7 days. UV-Vis spectra were acquired at day 7.

### b. Preparation of PEG-[<sup>64</sup>Cu]CuS NPs.

<sup>64</sup>CuCl<sub>2</sub> (20 μL, 1000 μCi) was added to 1 mL of CuCl<sub>2</sub> solution (1 mM) containing PEG-SH (2 μmol), after which 1 μL of sodium sulfide solution (1 M) was added to the [<sup>64</sup>Cu]CuCl<sub>2</sub> solution with stirring. The mixture was then heated to 90 °C for 15 min until a dark-green solution was obtained. The reaction mixture was transferred to ice-cold water to give PEG-[<sup>64</sup>Cu]CuS NPs.

### c. Photoacoustic (PA) imaging equipment

A Q-switched Nd:YAG laser (LS-2137, Sympotic Tii, Camarillo, CA, USA) provides 10-ns, 355-mJ pulsed 1064-nm laser at a repetition rate of 10 Hz. The laser beam is expanded by a concave lens and homogenized by a ground-glass lens and then directed onto a mouse tumor with beam size of 2 cm in diameter. NIR light diffuses inside a tissue sample and induces PA waves. The waves travel through the tissue and are coupled to an unfocused ultrasonic transducer with a 6-mm-diameter active element and 1.8-MHz detection bandwidth (V323/2.25 MHz, Panametrics, Waltham, MA, USA), which converts the PA pressure into piezoelectric signals. The signals are subsequently amplified by amplifiers (ZFL-500LN, Mini-Circuits, and 5072PR, Panametrics, Waltham, MA, USA), bandpass-filtered by our homemade filters, and finally recorded using a digital data acquisition card (CS14100, Gage Applied, Inc., Lockport, IL, USA). The sample and a transducer are both immersed in a tank filled with water for coupling the PA waves to the transducer. The ultrasonic transducer is driven by a step motor to

continuously scan horizontally along a 15-cm-diameter circle around the sample. A personal computer is used to control the scanning and data acquisition.

#### **d. Copper staining in 4T1 tumors**

A stock solution of 0.2% 5-(p-dimethylaminobenzyl)-rhodanine (JT Baker Company, Phillipsburg, NJ) was prepared by mixing 0.2 g of the compound in 100 mL absolute ethanol. A working solution of rhodanine was then prepared by mixing 20 mL of the stock solution with 30 mL of deionized water. Tissue sections that had been de-paraffinized and rehydrated to deionized water were placed in the rhodanine working solution in a 60°C oven for 1 h. They were then rinsed four times in deionized water, counter-stained with Mayer's hematoxylin for 10 minutes, and rinsed another three times in deionized water. After brief bluing in 0.5% sodium borate solution, they were rinsed another three times in deionized water, dehydrated and cleared with two changes each of 95% ethanol, absolute ethanol, and xylene, and mounted with a resinous medium.

#### **e. Study of temperature changes in aqueous solution of CuS NPs under 1064-nm and 808-nm NIR laser light**

For measurement of temperature change mediated by CuS NPs, continuous NIR laser light (808 nm, 3 W/cm<sup>2</sup>, Diomed, Andover, MA) or pulse laser light (1064 nm, 4.32 W/cm<sup>2</sup>) was delivered through a quartz cuvette containing CuS NPs (100 µg/mL). A thermocouple was inserted into the solution perpendicular to the path of the laser light.

#### **f. Statistical Analysis**

Differences in necrosis (expressed as percentage of necrotic area after treatments) were analyzed using the two-tailed Student's *t* test. Differences between groups were considered statistically significant at  $p < 0.05$ .

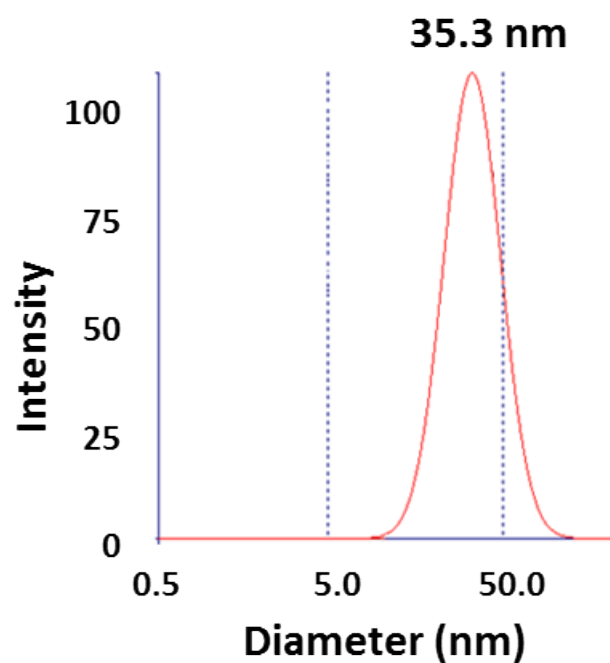

**Figure S1. Dynamic light scattering of PEG-CuS NPs at 6 months after storage in water at 4 °C in the presence of argon.** The size of the nanoparticles was essentially unchanged compared to that of freshly prepared nanoparticles (Fig. 1C).

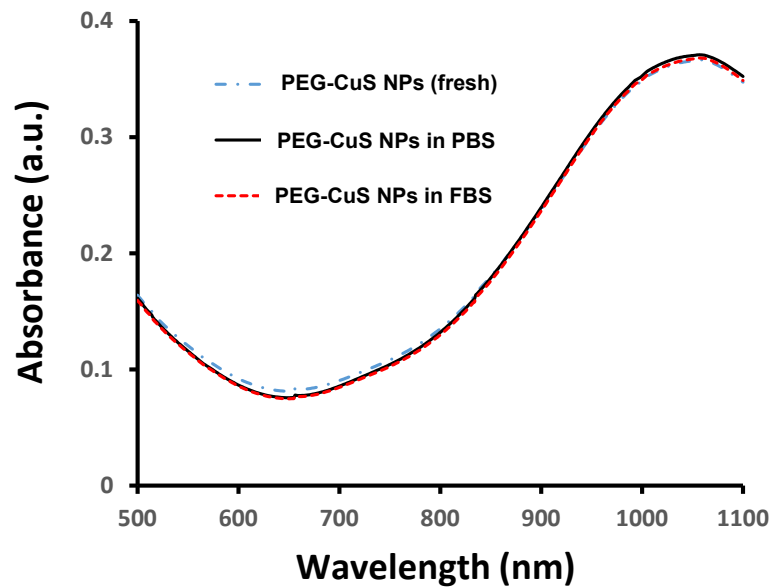

**Figure S2.** UV-Vis spectra of PEG-CuS NPs after incubation in PBS and FBS media at 37 °C for 7 days.

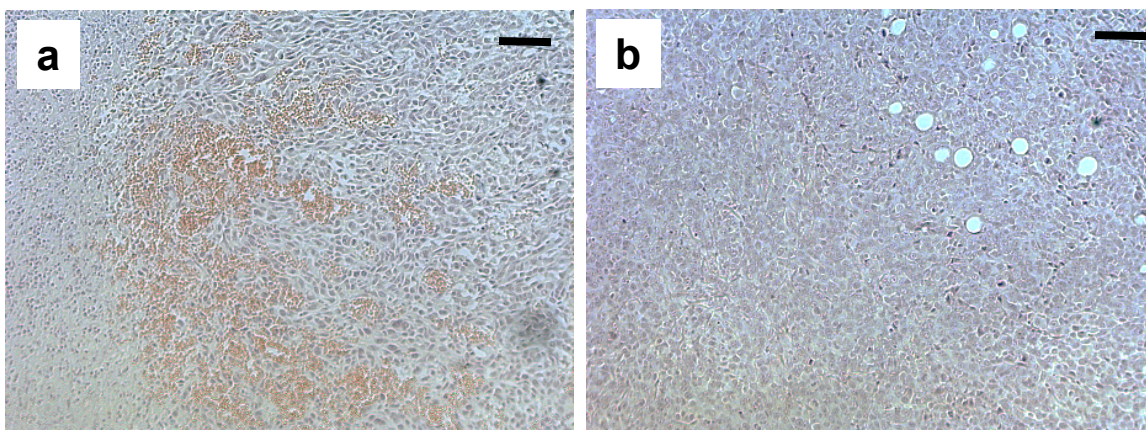

**Figure S3. Copper staining of excised 4T1 tumors.** (a) Copper was seen in a tumor from a mouse injected with PEG-CuS NPs. (b). No copper ions were detected in a tumor from a mouse that did not receive PEG-CuS NPs. Bar = 50  $\mu$ m

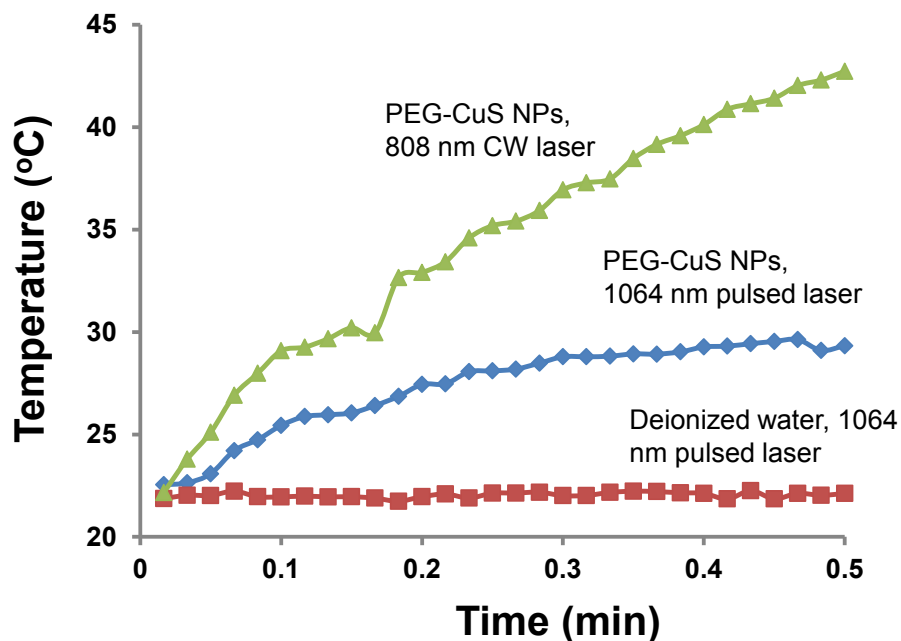

**Figure S4.** Temperature change after exposure of aqueous solution of PEG-CuS NPs (100  $\mu\text{g/mL}$ ) to continuous wave (CW) laser light at 808 nm (3  $\text{W/cm}^2$ ) and pulsed laser light at 1064 nm (4.32  $\text{W/cm}^2$ ). Deionized water was also exposed to pulsed laser at 1064 nm (4.32  $\text{W/cm}^2$ ) as a control. Temperature elevation was observed only for solutions containing PEG-CuS NPs. Exposure to CW laser generated more heat than exposure to pulsed laser.

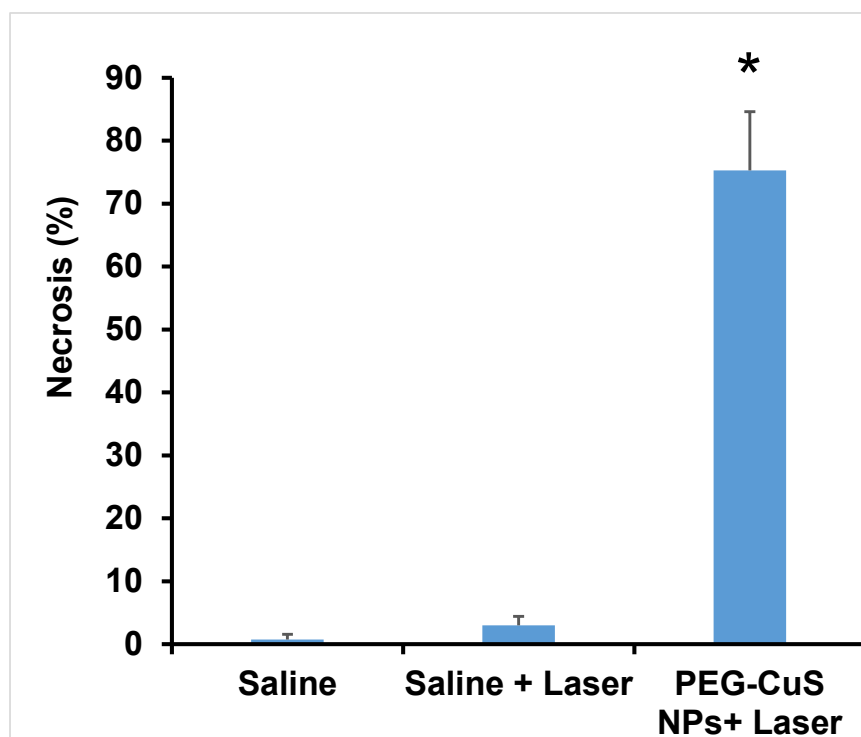

**Figure S5. Quantitative analysis of the percentage of necrotic area induced by various treatments.** Asterisks indicate statistical significance relative to the saline group ( $p < 0.0001$ ) and saline group ( $p < 0.0001$ ). Error bars represent standard deviations ( $n = 4$ ).
